# Supplementary material for: Dihydronicotinamide riboside: synthesis from nicotinamide riboside chloride, purification and stability studies
Source: Royal Society of Chemistry journal article supplement (doi:10.1039/d1ra02062e), 2021-01-01
Supplement: d1ra02062e1.pdf [file d1ra02062e1.pdf]

## Supporting Information

### **Dihydronicotinamide riboside: synthesis from nicotinamide riboside chloride, purification and stability studies**

Amin Zarei<sup>a†</sup>, Leila Khazdooz<sup>a†</sup>, Mojtaba Enayati<sup>a</sup>, Sara Madarshahian<sup>a</sup>, Timothy J. Wooster<sup>b</sup>,  
Gerhard Ufheil<sup>c</sup>, Alireza Abbaspourrad<sup>a\*</sup>

<sup>a</sup>Department of Food Science, College of Agriculture and Life Sciences, Cornell University, Ithaca  
14853, NY, USA

<sup>b</sup>Institute of Material Science, Nestle Research, CH-1000 Lausanne 26, Switzerland

<sup>c</sup>Nestle Product Technology Center Bridgewater, Nestle Nutrition R&D Inc., Bridgewater, NJ  
08807, USA

†These authors contributed equally to this work.

Corresponding Author; Email: [Alireza@cornell.edu](mailto:Alireza@cornell.edu) (A.A.)

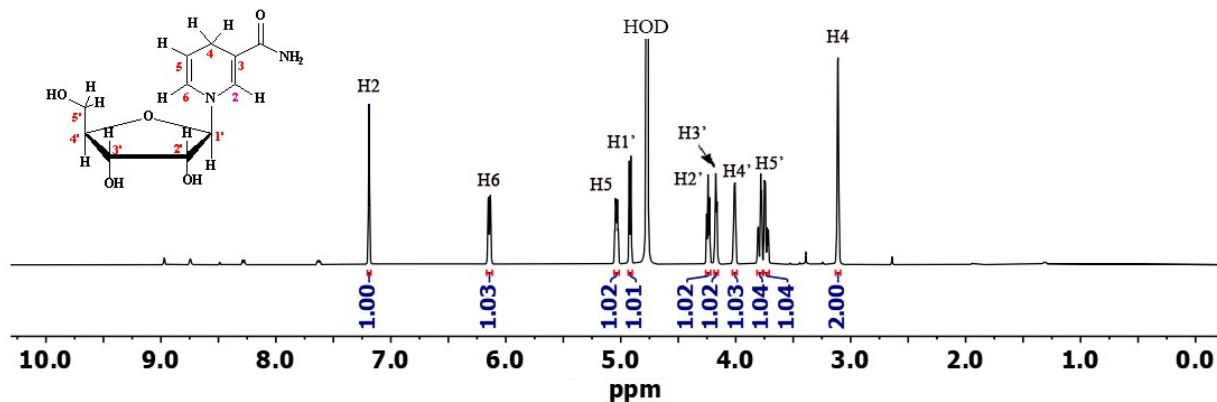

**Figure S1.**  $^1\text{H}$  NMR Spectrum of NRH in  $\text{D}_2\text{O}$ .

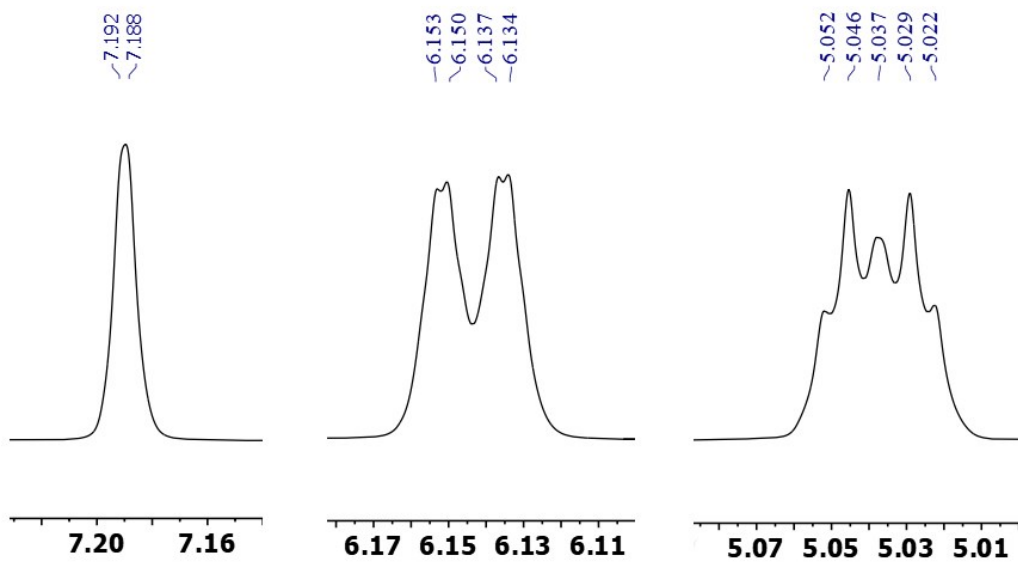

**Figure S2.**  $^1\text{H}$  NMR Spectrum of NRH in  $\text{D}_2\text{O}$ . Expanded between 5.00-7.20 ppm.

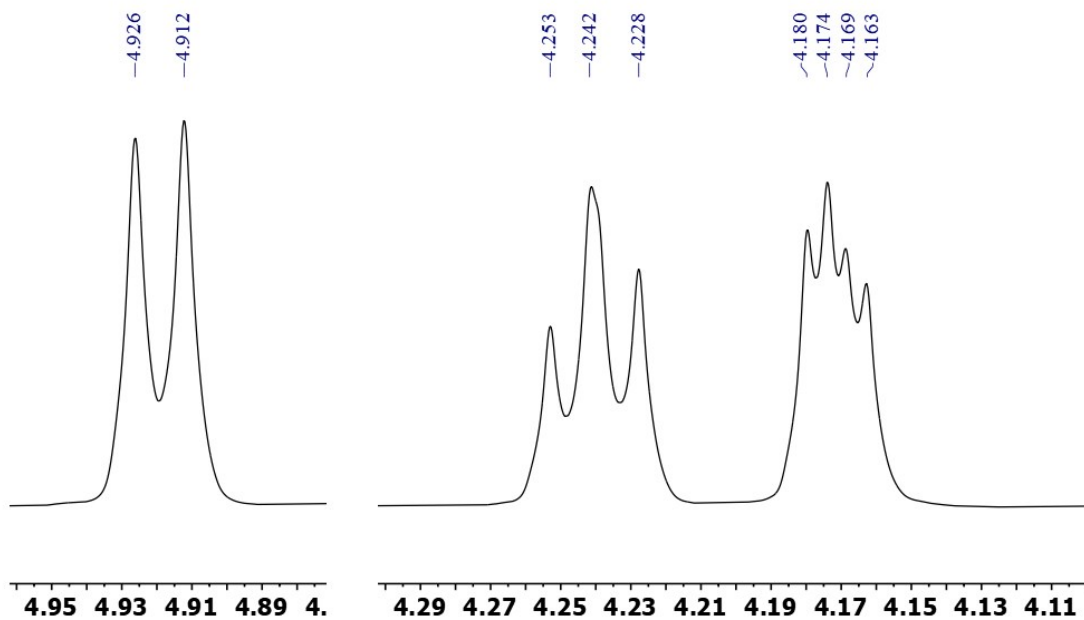

**Figure S3.**  $^1\text{H}$  NMR Spectrum of NRH in  $\text{D}_2\text{O}$ . Expanded between 4.11-4.95 ppm.

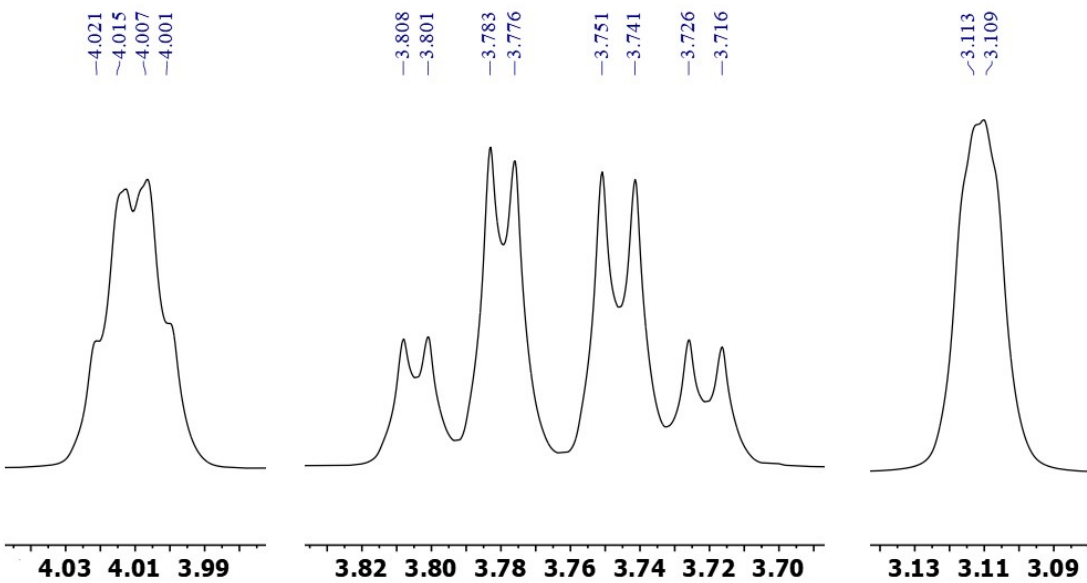

**Figure S4.**  $^1\text{H}$  NMR Spectrum of NRH in  $\text{D}_2\text{O}$ . Expanded between 3.09-4.03 ppm.

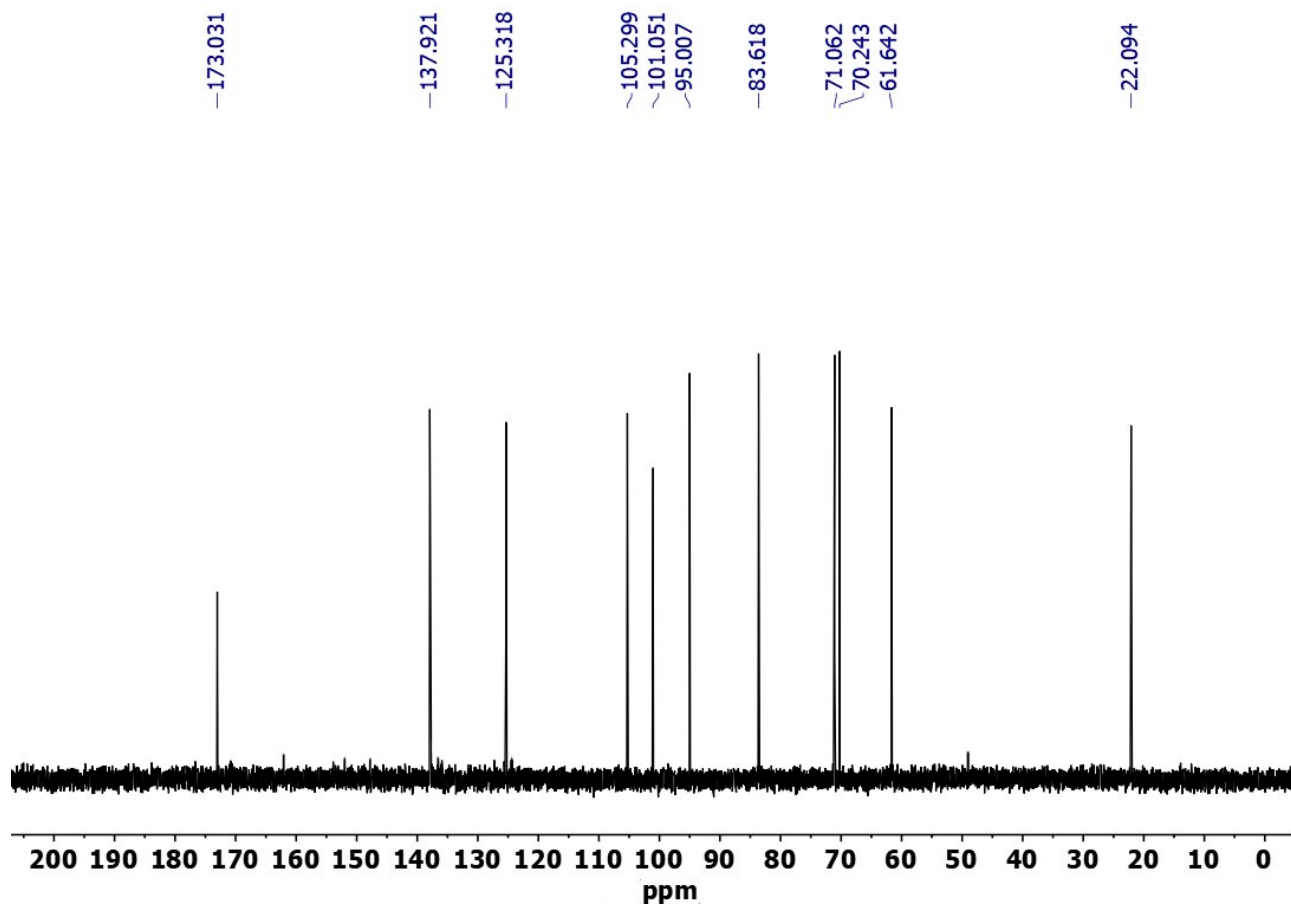

Figure S5.  $^{13}\text{C}$  NMR Spectrum of NRH in  $\text{D}_2\text{O}$ .

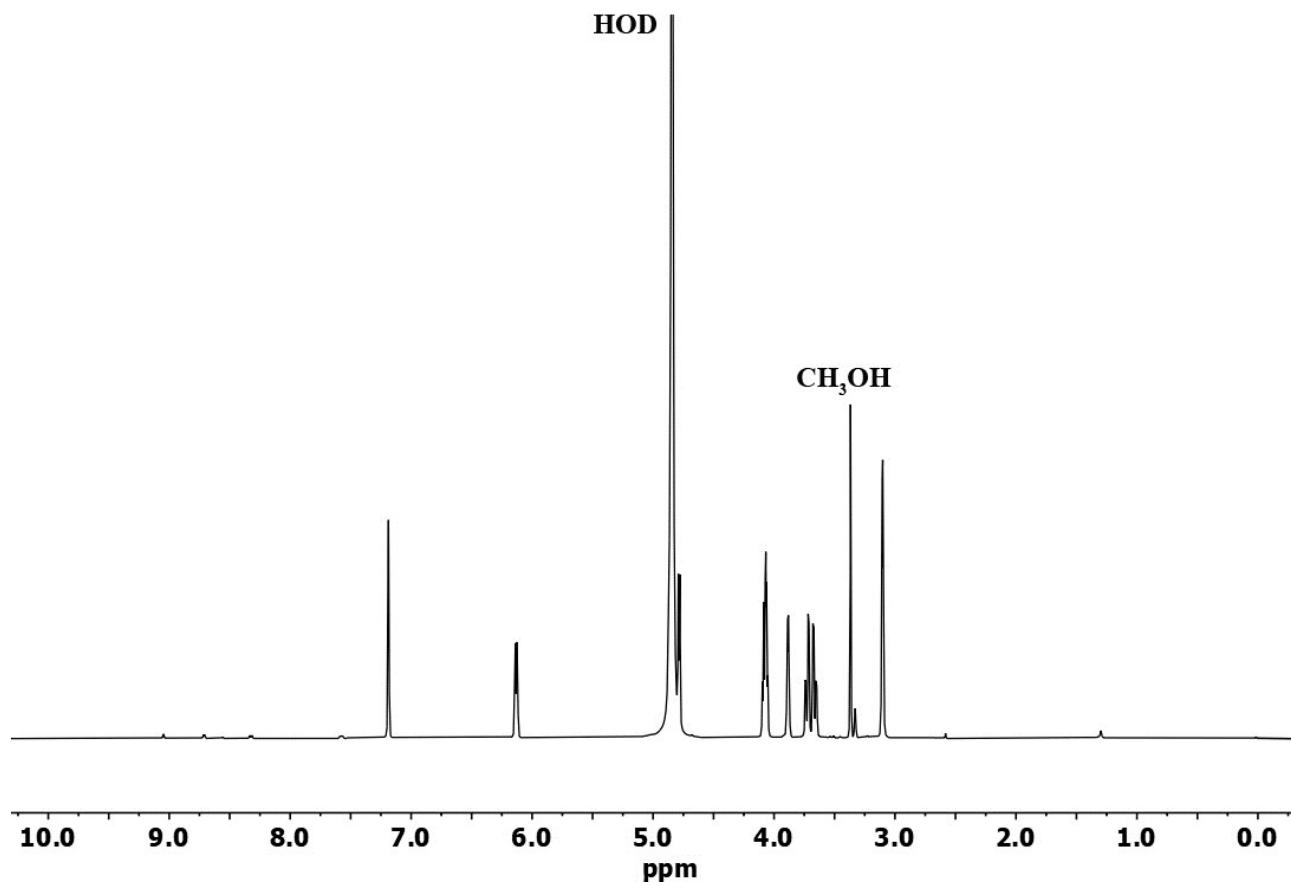

**Figure S6.**  $^1\text{H}$  NMR Spectrum of NRH in  $\text{CD}_3\text{OD}$ .

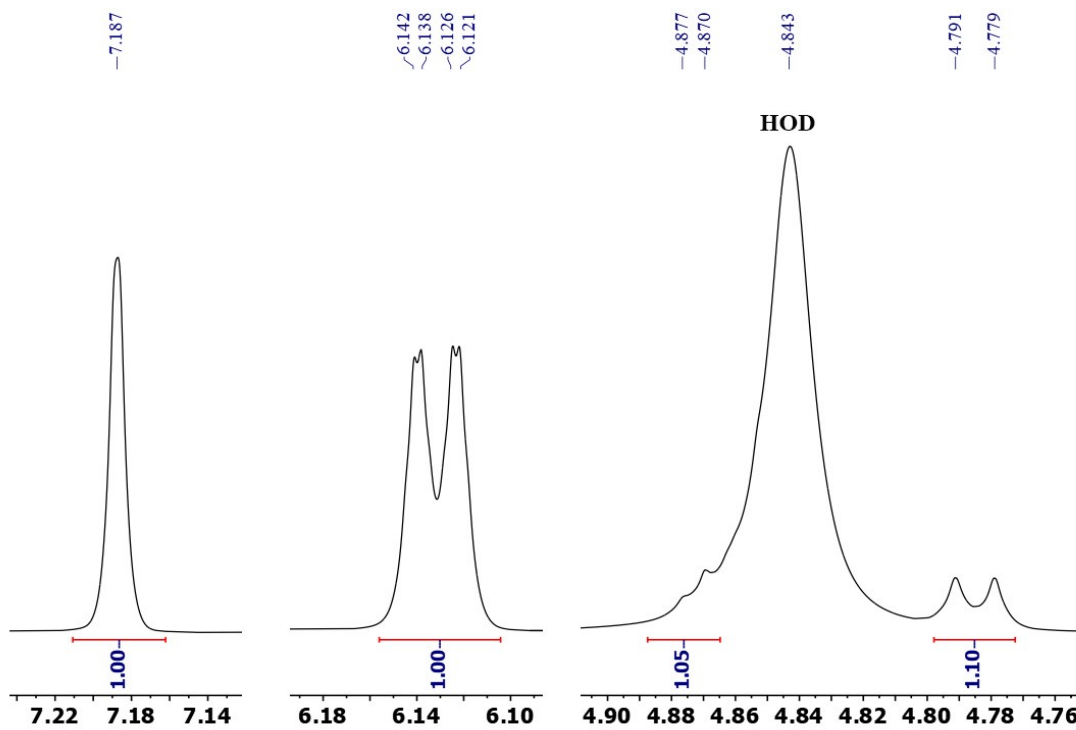

**Figure S7.**  $^1\text{H}$  NMR Spectrum of NRH in  $\text{CD}_3\text{OD}$ . Expanded between 4.76-7.22 ppm.

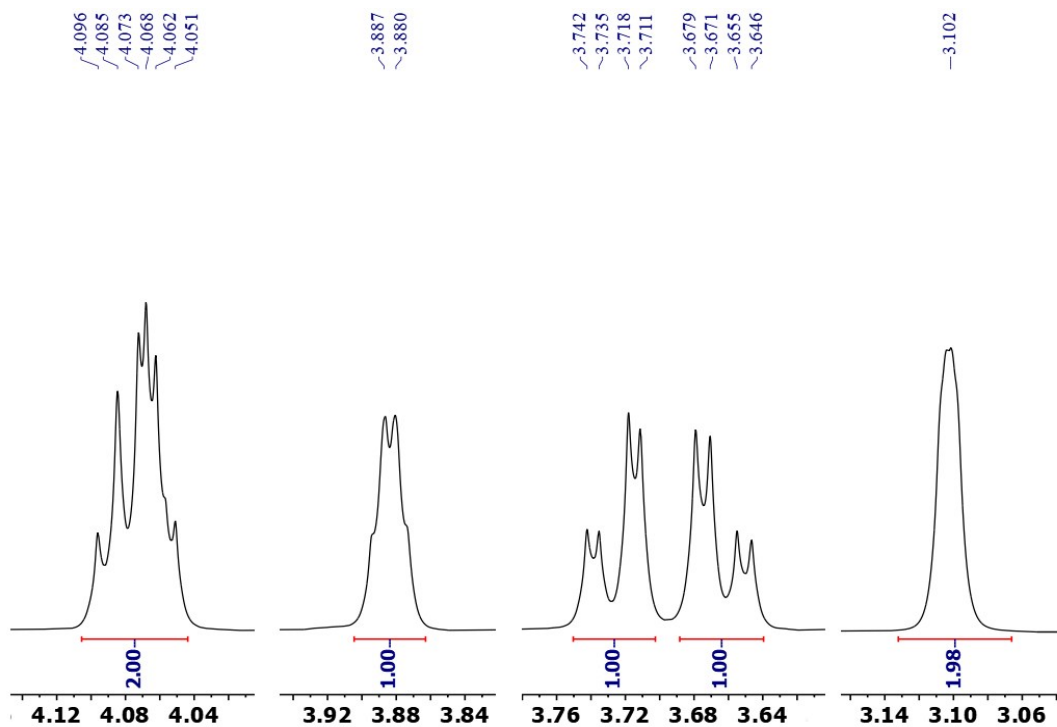

**Figure S8.**  $^1\text{H}$  NMR Spectrum of NRH in  $\text{CD}_3\text{OD}$ . Expanded between 3.06-4.12 ppm.

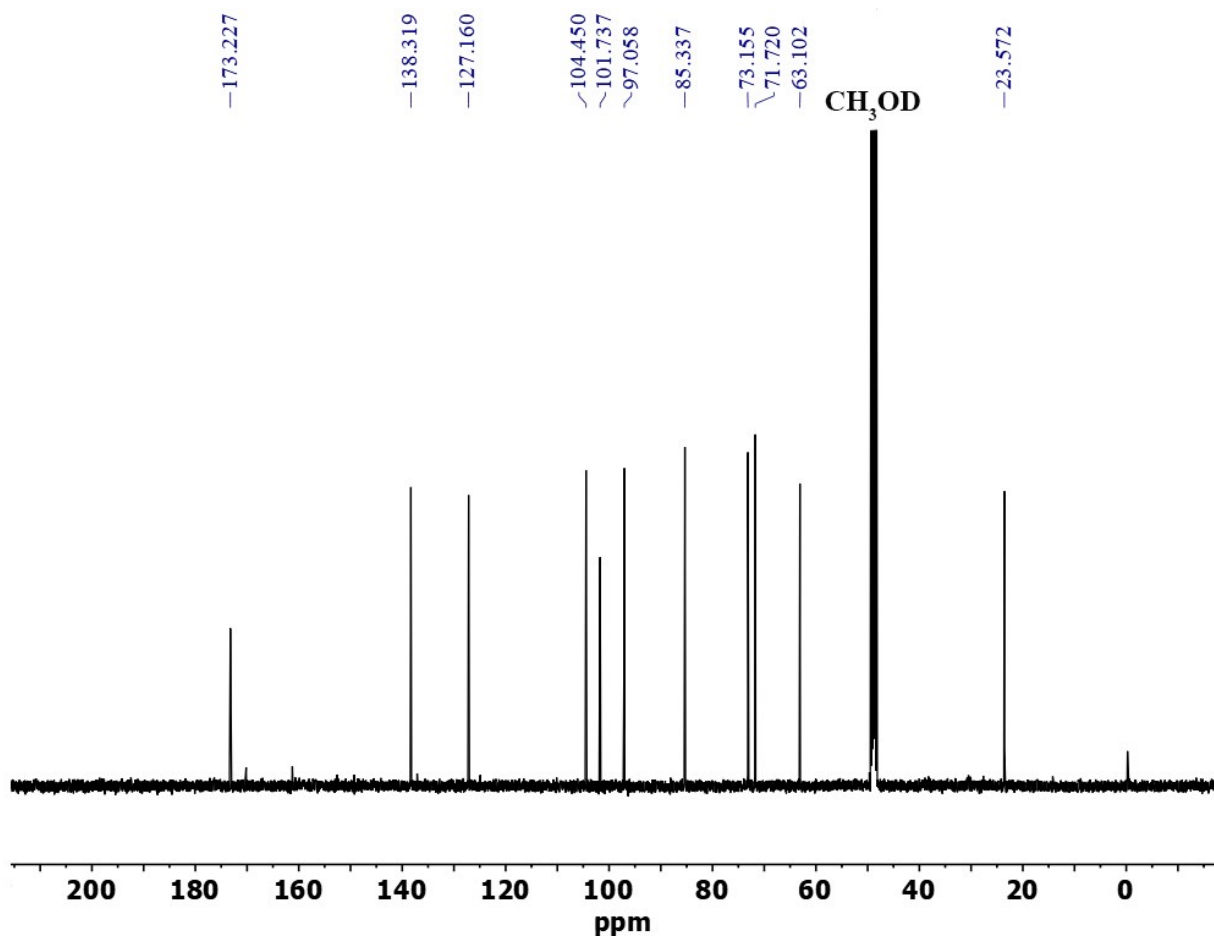

Figure S9.  $^{13}\text{C}$  NMR Spectrum of NRH in  $\text{CD}_3\text{OD}$ .

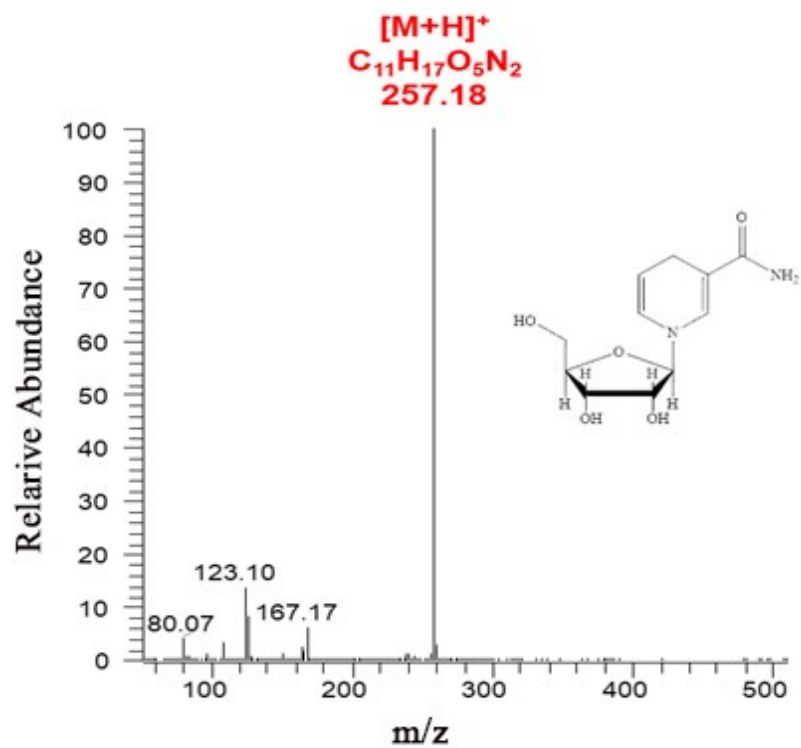

Figure S10. MS of NRH.

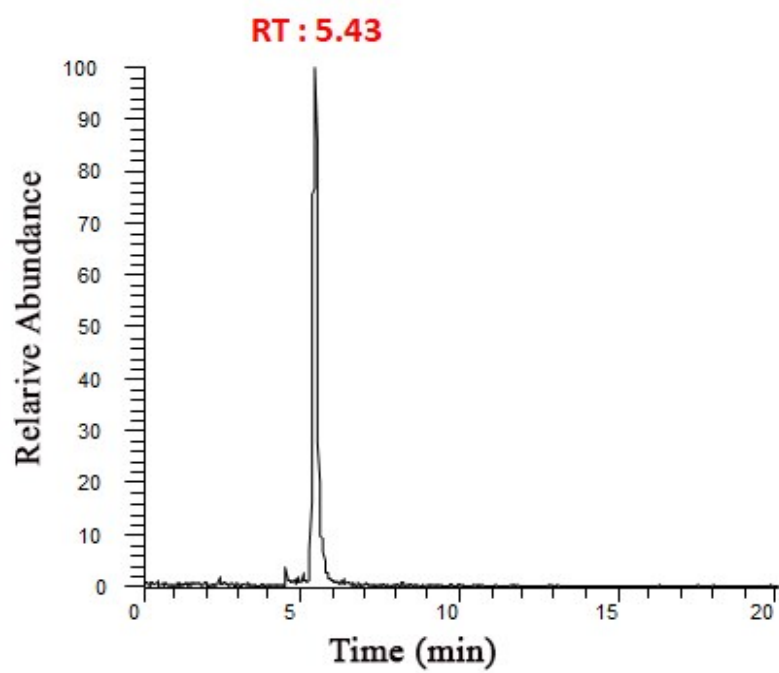

Figure S11. Selected Reaction Monitoring (SRM) of NRH.



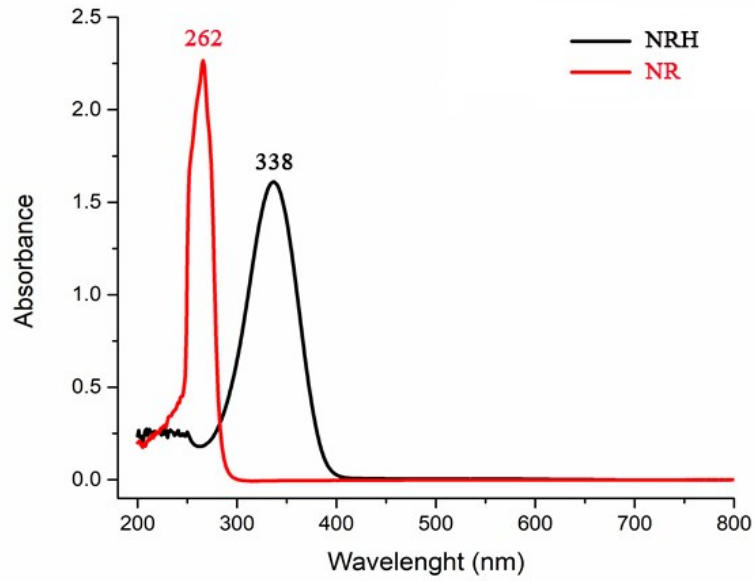

**Figure S12.** UV-VIS Spectrum of NRH in H<sub>2</sub>O.

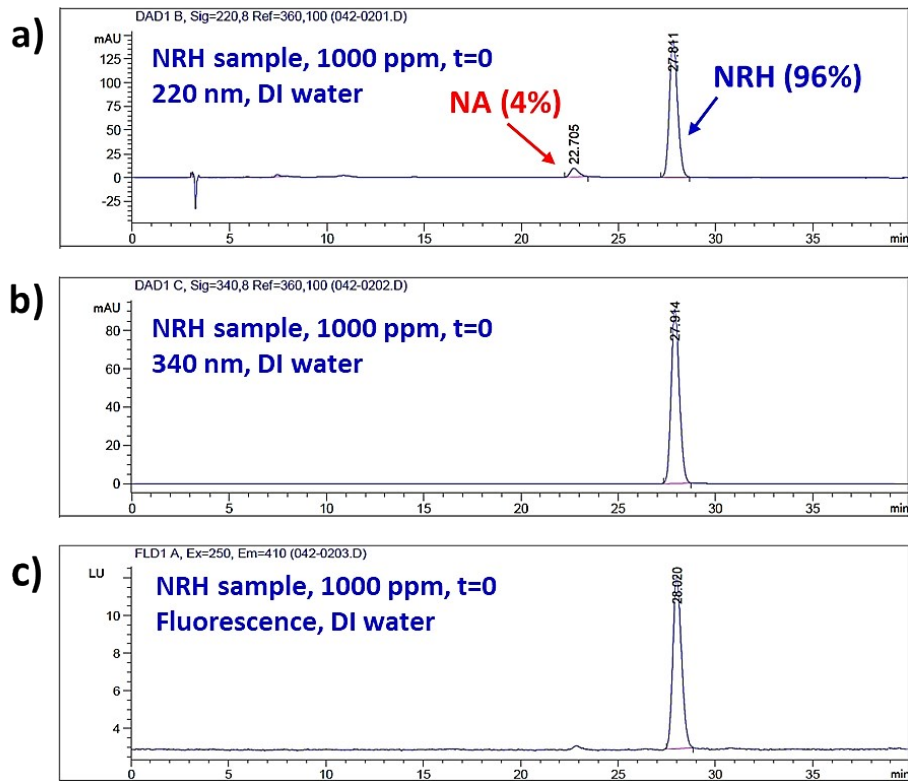

**Figure S13.** The HPLC chromatograms of the purified NRH **a)** UV detector at 220 nm, **b)** UV detector at 340 nm, and **c)** fluorescence detector.

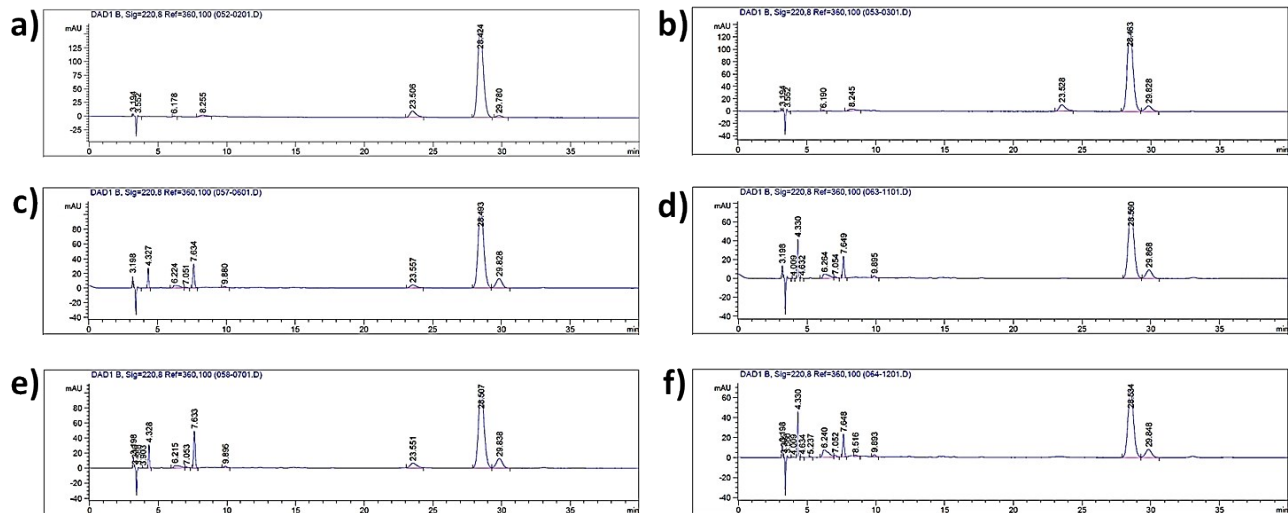

**Figure S14.** The HPLC chromatograms of the NRH aqueous solutions stored at different conditions for 60 days. **a)** at 4 °C under N<sub>2</sub> and darkness, **b)** at 4 °C under air and darkness, **c)** at 25 °C under N<sub>2</sub> and darkness, **d)** at 25 °C under air and darkness, **e)** at 25 °C under N<sub>2</sub> and light, and **f)** at 25 °C under air and light.

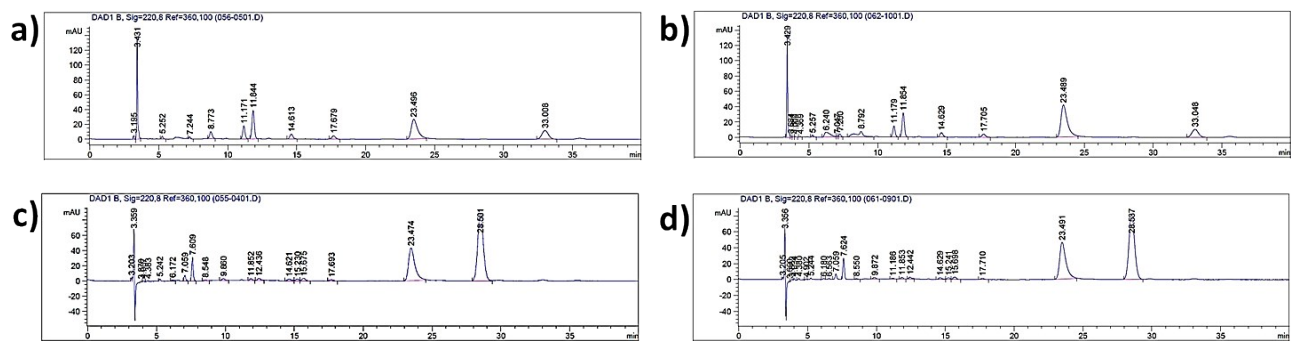

**Figure S15.** The HPLC chromatograms of the NRH aqueous solutions stored at different conditions for 60 days. **a)** pH=7.0, at 25 °C, under N<sub>2</sub> and dark, **b)** pH=7.0, at 4 °C, under air and dark, **c)** pH=9.0, at 25 °C, under N<sub>2</sub> and dark, and **d)** pH=9.0, at 25 °C, under air and dark.

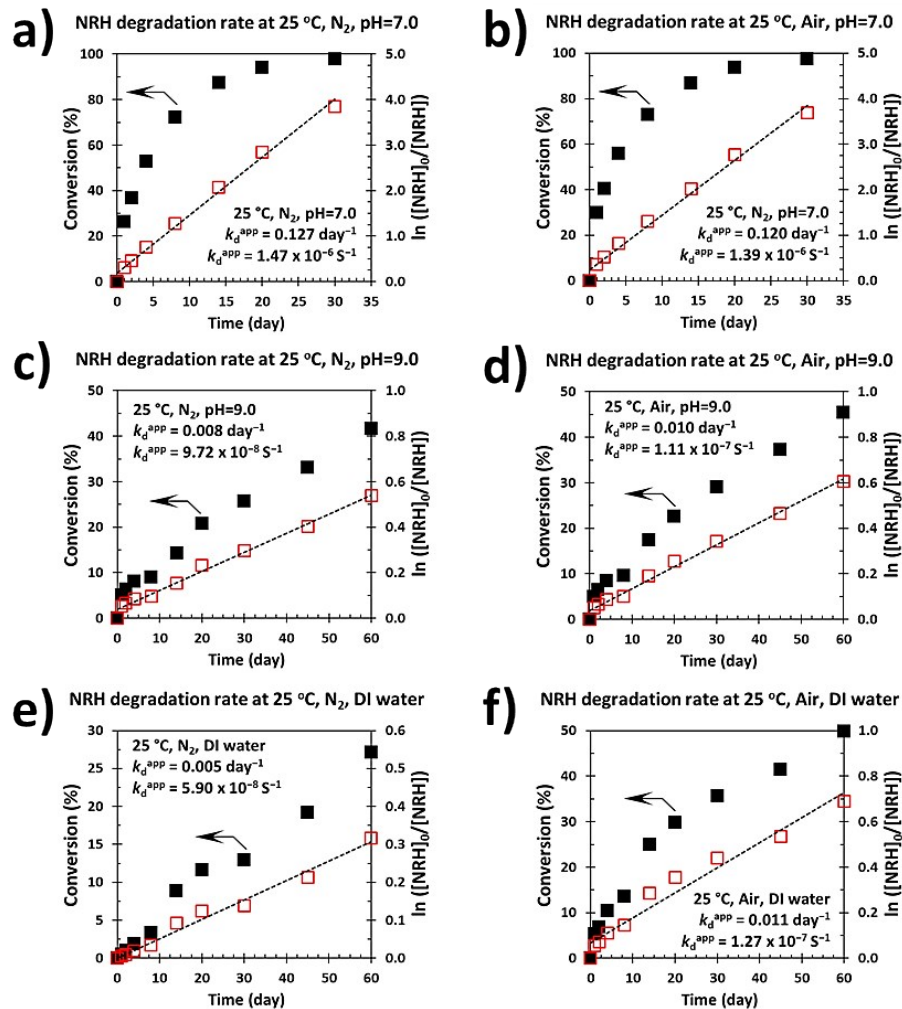

**Figure S16.** Kinetic graphs and the first order degradation rates for some of NRH samples. **a, b)** pH= 7.0, at 25 °C, under N<sub>2</sub> and air, **c, d)** pH= 9.0, at 25 °C, under N<sub>2</sub> and air, **e, f)** DI water, at 25 °C, under N<sub>2</sub> and air.
